# Supplementary material for: Prophylactic Delivery of a Bacteriophage Cocktail in Feed Significantly Reduces Salmonella Colonization in Pigs
Source: PubMed Central journal article supplement (PMC9241700; doi:10.1128/spectrum.00422-22), 2022-05-17
Supplement: spectrum.00422-22-s001.pdf [file spectrum.00422-22-s001.pdf]

**Product code: 584 WEANER PELLETS**

A complete feedingstuff for feeding to pigs from 8.0kg live weight.

**ANALYTICAL CONSTITUENTS**

|               |       |   |                  |       |     |
|---------------|-------|---|------------------|-------|-----|
| Crude protein | 20.00 | % | Calcium          | 0.65  | %   |
| Crude fat     | 5.80  | % | Phosphorus       | 0.60  | %   |
| Crude fibre   | 2.60  | % | Magnesium        | 0.15  | %   |
| Crude ash     | 5.60  | % | Sodium           | 0.31  | %   |
| Lysine        | 1.40  | % | Copper (total)   | 166.0 | ppm |
| Methionine    | 0.44  | % | Selenium (total) | 0.38  | ppm |

**COMPOSITION** Wheat, Soya (bean) meal feed, dehulled [\*], Barley, Cooked Wheat, Soya Beans, extruded[\*], Soya Oil[\*], Corn, Sugar, Demineralised Whey Powder, Fish Meal, Cooked Barley, Monocalcium Phosphate, Calcium Carbonate, Sodium Chloride, Sodium Carbonate, Sodium Bicarbonate and Onion soluble and grape pip soluble.

**ADDITIVES (PER KG)**

**TECHNOLOGICAL:**

E321 BHT 2.4 mg, E563 Sepiolitic clay 148 mg

**NUTRITIONAL:** 3a672a Vitamin A 10000 IU, E671 Vitamin D3 2000 IU, 3a700 Vitamin E/all-rac-alpha-tocopheryl acetate 75 IU, E1 Iron Sulphate Monohydrate 400 ppm, 3b202 Calcium Iodate Anhydrous 1.6 ppm, E4 Copper Sulphate Pentahydrate 640 ppm, 3b503 Manganese Sulphate Monohydrate 218.8 ppm, 3b603 Zinc Oxide 152.8 ppm, E8 Sodium Selenite 0.6 ppm

**ZOOTECNICAL:**

4a1617 Endo-1,4-bèta-xylanase EC 3.2.1.8 1500 EPU, 4a16 6-Phytase EC 3.1.3.26 350 OTU

Contains 125ppm ProviOX 50, which contains compounds with anti-oxidant properties to partially replace Vitamin E.

[\*]Produced from GM soyabeans. CONTAINS FISHMEAL. DO NOT FEED TO RUMINANTS. For Swine and Poultry: Simultaneous use with water for drinking in which choline chloride has been added should be avoided. Store in a cool dry place. KEEP AWAY FROM CHILDREN. In case of query, please return label.

**Supplementary Figure 1.** Product label added to pelleted feed with dried phages.

a

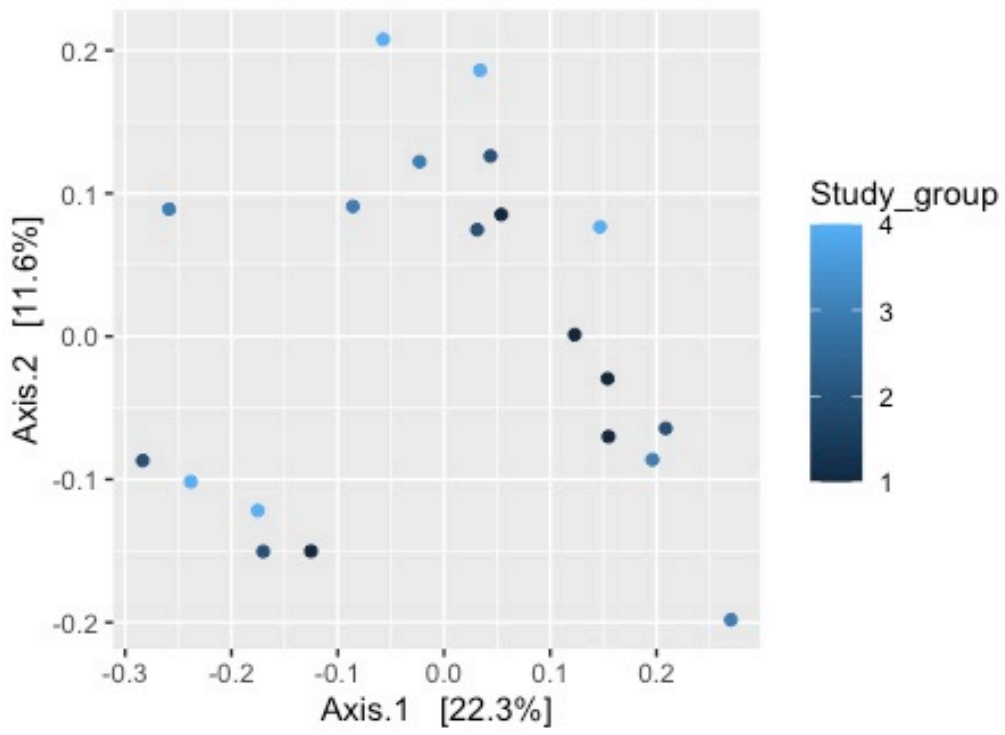

b

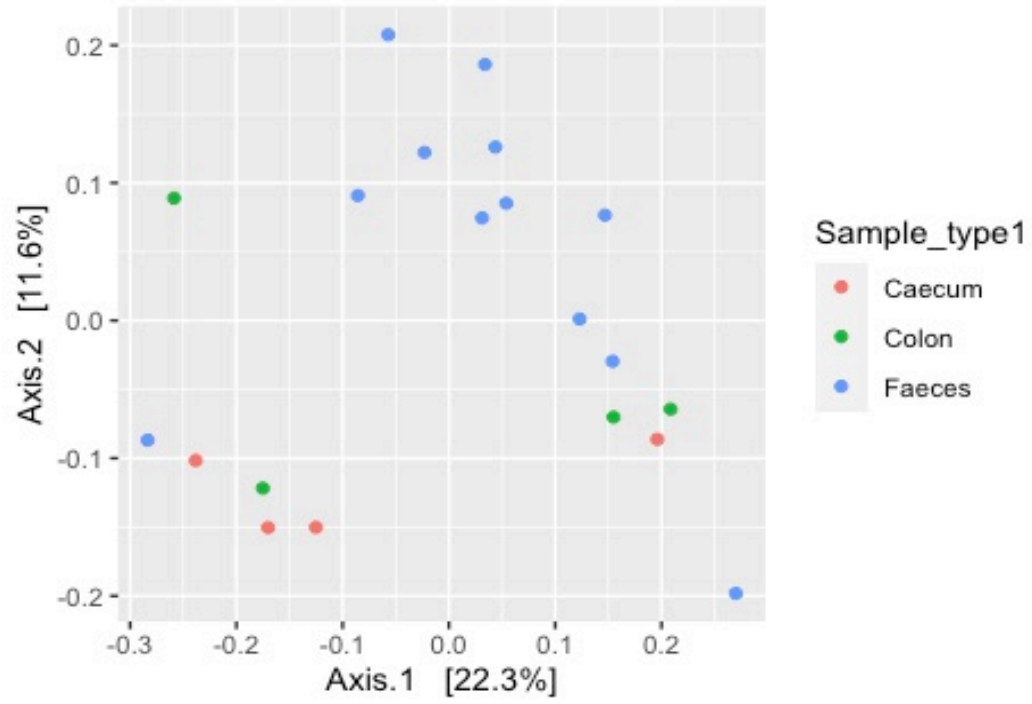

c

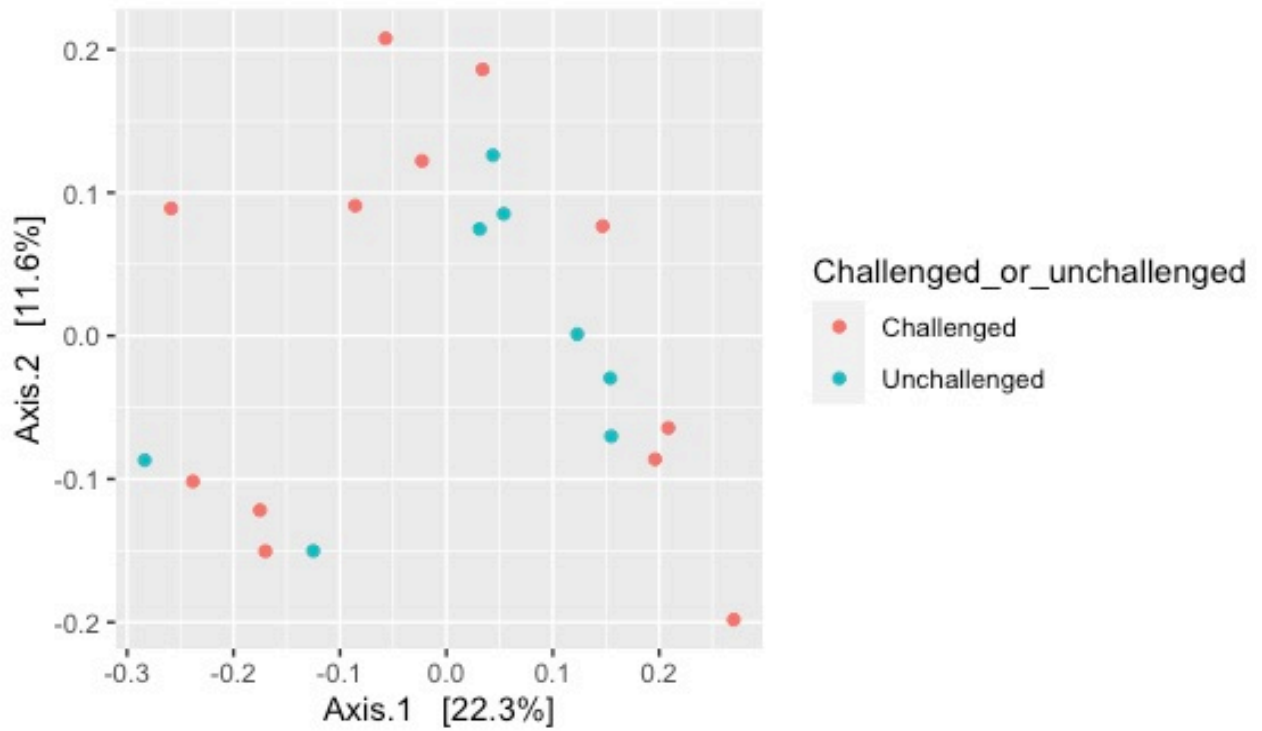

d

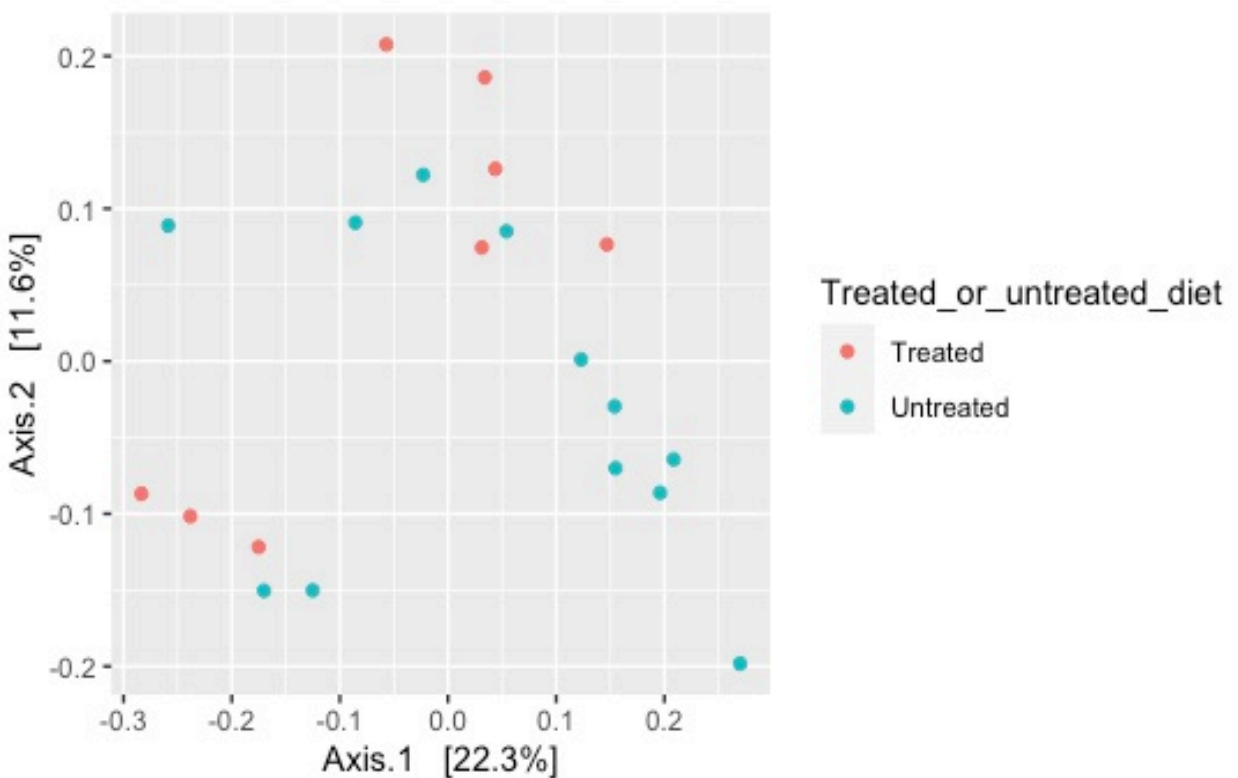

**Supplementary Figure 2.** Principle coordinates analysis (PCoA) plots using the unweighted UniFrac distance matrix generated from taxon abundances and showing patterns of beta diversity between (a) samples in different study groups (not significant (ns)), (b) different samples types (ns), (c) samples tested from challenged or unchallenged piglets (ns) and (d)

samples taken from pigs fed the treated phage diet or the untreated diet ( $p=0.039$ ). P-value was calculated using PERMANOVA and  $p<0.05$  was considered significant.

**Supplementary Table 1.** The different excipients formulations tested using the commercial spray dryer to minimise phage loss.

| <b>Run</b> | <b>Excipient formulation</b>                          | <b>Final phage titre when mixed with excipients (PFU/ml)</b> | <b>Atomiser<sup>1</sup> (%)</b> | <b>Outlet temperature</b> | <b>Inlet temperature</b> | <b>Moisture content (%)</b> | <b>Average phage recovery (PFU/g)</b> | <b>Drop in phage titre</b> |
|------------|-------------------------------------------------------|--------------------------------------------------------------|---------------------------------|---------------------------|--------------------------|-----------------------------|---------------------------------------|----------------------------|
| <b>A</b>   | 8% Trehalose<br>8% mannitol<br>1% leucine<br>1% phage | $2.92 \times 10^7$                                           | 80                              | 70                        | 160                      | 3.00                        | 0                                     | $-2.92 \times 10^7$        |
| <b>B</b>   | 8% Trehalose<br>8% mannitol<br>1% leucine<br>1% phage | $2.92 \times 10^7$                                           | 80                              | 65                        | 160                      | 3.00                        | 0                                     | $-2.92 \times 10^7$        |
| <b>C</b>   | 8% Trehalose<br>8% mannitol<br>1% leucine<br>1% phage | $2.92 \times 10^7$                                           | 90                              | 54                        | 125                      | 5.00                        | $9 \times 10^3$                       | $-3.24 \times 10^3$        |
| <b>D</b>   | 8% Trehalose<br>8% mannitol<br>1% leucine<br>1% phage | $2.92 \times 10^7$                                           | 80                              | 52                        | 120                      | 5.00                        | $1.7 \times 10^4$                     | $-1.72 \times 10^3$        |
| <b>E</b>   | 8% Trehalose<br>8% mannitol<br>1% leucine<br>1% phage | $2.92 \times 10^7$                                           | 70                              | 52                        | 120                      | 5.12                        | $1.7 \times 10^4$                     | $-1.72 \times 10^3$        |
| <b>F</b>   | 8% Trehalose<br>8% mannitol<br>1% leucine<br>1% phage | $2.92 \times 10^7$                                           | 60                              | 52                        | 120                      | 5.01                        | $1.2 \times 10^4$                     | $-2.43 \times 10^3$        |
| <b>G</b>   | 8% Trehalose<br>8% mannitol<br>1% leucine<br>1% phage | $2.92 \times 10^7$                                           | 50                              | 52                        | 120                      | 5.11                        | $1.2 \times 10^4$                     | $-2.43 \times 10^3$        |
| <b>H</b>   | 8% Trehalose                                          | $2.92 \times 10^7$                                           | 90                              | 52                        | 100                      | 7.23                        | $2.0 \times 10^4$                     | $1.46 \times 10^3$         |

|          |                                                         |                        |    |    |     |      |                       |                        |
|----------|---------------------------------------------------------|------------------------|----|----|-----|------|-----------------------|------------------------|
|          | 8% mannitol<br>1% leucine<br>1% phage                   |                        |    |    |     |      |                       |                        |
| <b>I</b> | 8% Trehalose<br>8% mannitol<br>1% leucine<br>1% phage   | 2.92 x 10 <sup>7</sup> | 80 | 52 | 100 | 7.10 | 1.7 x 10 <sup>4</sup> | 1.72 x 10 <sup>3</sup> |
| <b>J</b> | 8% Trehalose<br>8% mannitol<br>1% leucine<br>5% phage   | 1.46 x 10 <sup>8</sup> | 80 | 52 | 100 | 5.04 | 1.9 x 10 <sup>5</sup> | 7.69 x 10 <sup>3</sup> |
| <b>K</b> | 8% Trehalose<br>8% mannitol<br>1% leucine<br>10% phage  | 2.92 x 10 <sup>8</sup> | 80 | 52 | 100 | 5.01 | 4.6 x 10 <sup>5</sup> | 6.35 x 10 <sup>2</sup> |
| <b>L</b> | 8% Trehalose<br>8% mannitol<br>1% leucine<br>40% phage  | 1.17 x 10 <sup>9</sup> | 80 | 52 | 100 | 5.03 | 1.3 x 10 <sup>5</sup> | 8.99 x 10 <sup>3</sup> |
| <b>M</b> | 8% trehalose<br>8% mannitol<br>1% leucine<br>50% phage  | 1.46 x 10 <sup>9</sup> | 80 | 52 | 100 | 5.39 | 1.8 x 10 <sup>5</sup> | 8.11 x 10 <sup>3</sup> |
| <b>N</b> | 8% Trehalose<br>8% mannitol<br>1% leucine<br>60% phage  | 1.75 x 10 <sup>9</sup> | 80 | 52 | 100 | 5.33 | 5.2 x 10 <sup>5</sup> | 3.37 x 10 <sup>3</sup> |
| <b>O</b> | 16% trehalose<br>8% mannitol<br>1% leucine<br>50% phage | 1.46 x 10 <sup>9</sup> | 80 | 55 | 100 | 8.43 | 2.8 x 10 <sup>5</sup> | 5.21 x 10 <sup>3</sup> |
| <b>P</b> | 16% Trehalose<br>8% mannitol<br>1% leucine<br>60% phage | 1.75 x 10 <sup>9</sup> | 80 | 52 | 100 | 5.21 | 1.1 x 10 <sup>6</sup> | 1.59 x 10 <sup>3</sup> |

|          |                                                                             |                    |    |    |     |      |                   |                    |
|----------|-----------------------------------------------------------------------------|--------------------|----|----|-----|------|-------------------|--------------------|
| <b>Q</b> | 16% trehalose<br>8% mannitol<br>1% leucine<br>50% phage                     | $1.46 \times 10^9$ | 80 | 65 | 110 | 8.14 | $8.7 \times 10^3$ | $1.68 \times 10^5$ |
| <b>R</b> | 8% trehalose<br>8% mannitol<br>1% leucine<br>50% phage                      | $1.46 \times 10^9$ | 80 | 60 | 100 | 5.22 | $1.4 \times 10^4$ | $1.04 \times 10^5$ |
| <b>S</b> | 8% trehalose<br>8% mannitol<br>1% leucine<br>2% euradagit s100<br>50% phage | $1.46 \times 10^9$ | 80 | 60 | 110 | 4.56 | $2.4 \times 10^6$ | $6.08 \times 10^2$ |
| <b>T</b> | 8% trehalose<br>8% mannitol<br>1% leucine<br>2% euradagit s100<br>50% phage | $1.46 \times 10^9$ | 80 | 50 | 100 | 5.00 | $5.3 \times 10^5$ | $2.75 \times 10^3$ |

<sup>1</sup>The atomiser settings refer to a percentage of 50Hz and 100% means the atomiser is rotating at its maximum speed and at 0% its stopped

**Supplementary Table 2.** Composition of the Provimi early weaner premix added at an inclusion rate of 4.10%.

| <b>Description</b>           | <b>Premix</b> | <b>Endpoint</b> |
|------------------------------|---------------|-----------------|
| Dry matter                   | 98.823 %      | 4.052 %         |
| Moisture                     | 1.177 %       | 0.048 %         |
| Crude protein                | 19.552 %      | 0.802 %         |
| Crude fat                    | 0.220 %       | 0.009 %         |
| Crude fat (after acid hydr.) | 0.226 %       | 0.009 %         |
| Crude fibre                  | 0.031 %       | 0.001 %         |
| Ash                          | 65.716 %      | 2.694 %         |
| Volume                       | 100 %         | 4.100 %         |
| Starch (Ewers)               | 0.215 %       | 0.009 %         |
| Sugar                        | 0.010 %       | 0.000 %         |
| Calcium                      | 12.629 %      | 0.518 %         |
| Phosphorous P                | 5.051 %       | 0.207 %         |
| Magnesium                    | 0.322 %       | 0.013 %         |
| Sodium                       | 6.732 %       | 0.276 %         |
| Potassium                    | 0.146 %       | 0.006 %         |
| Chloride                     | 10.148 %      | 0.416 %         |
| Sulphur, total               | 1.527 %       | 0.063 %         |
| P dog. (pigs)                | 7.274 %       | 0.298 %         |
| DE pigs                      | -3.061 MJ/kg  | -0.125 MJ/kg    |
| ME pigs                      | 4.838 MJ/kg   | 0.198 MJ/kg     |
| ME Sch Neu                   | 6.104 MJ/kg   | 0.250 MJ/kg     |
| NE pigs                      | 3.481 MJ/kg   | 0.143 MJ/kg     |
| Lysine                       | 9.989 %       | 0.410 %         |
| Methionine                   | 3.719 %       | 0.152 %         |
| Meth.+Cyst                   | 3.720 %       | 0.153 %         |
| Threonine                    | 5.379 %       | 0.221 %         |
| Tryptophan                   | 0.407 %       | 0.017 %         |
| Meth./Lysine                 | 0.372 -       | 0.372 -         |
| Meth.+Cyst./Lysine           | 0.372 -       | 0.372 -         |
| Threon./Lysine               | 0.539 -       | 0.539 -         |
| Trypt./Lysine                | 0.041 -       | 0.041 -         |
| AID Lysine (pigs)            | 10.271 %      | 0.421 %         |
| AID Methionine (pigs)        | 3.807 %       | 0.156 %         |
| AID Meth.+Cyst (pigs)        | 3.910 %       | 0.160 %         |
| AID Threonine (pigs)         | 5.529 %       | 0.227 %         |
| AID Tryptohan (pigs)         | 0.513 %       | 0.021 %         |
| C18:2 (Linoleic acid)        | 0.016 %       | 0.001 %         |
| Fe total                     | 3,659.181 mg  | 150.026 mg      |
| Fe (sulphate) (E1)           | 2,926.829 mg  | 120.000 mg      |
| Cu total                     | 3,913.084 mg  | 160.437 mg      |
| Cu (sulphate) (E4)           | 3,902.439 mg  | 160.000 mg      |
| Zn total                     | 2,740.039 mg  | 112.342 mg      |
| Zn (oxide) (3b603)           | 2,682.927 mg  | 110.000 mg      |
| Mn Total                     | 1,745.685 mg  | 71.573 mg       |
| Mn (sulphate) (3b503)        | 1,707.317 mg  | 70.000 mg       |
| Se total                     | 6.701 mg      | 0.275 mg        |
| Se (Na-selenite) (E8)        | 6.098 mg      | 0.250 mg        |
| Co total                     | 0.165 mg      | 0.007 mg        |
| I total                      | 24.390 mg     | 1.000 mg        |



|                                       |                |               |
|---------------------------------------|----------------|---------------|
| I (Ca-iodate) (3b202)                 | 24.389 mg      | 1.000 mg      |
| Mo total                              | 0.000 mg       | 0.000 mg      |
| Vitamin A (3a672a)                    | 0.244 MIU      | 0.010 MIU     |
| Vitamin D3 (3a671)                    | 0.049 MIU      | 0.002 MIU     |
| Vitamin E (3a700)                     | 1,829.268 mg   | 75.000 mg     |
| Vitamin E eq. (from proviox)          | 3,048.781      | 125.000 mg    |
| Vitamin K3 (3a711)                    | 48.780 mg      | 2.000 mg      |
| Vitamin B1 (3a821)                    | 24.390 mg      | 1.000 mg      |
| Vitamin B2                            | 121.951 mg     | 5.000 mg      |
| Vitamin B6 (3a831)                    | 24.390 mg      | 1.000 mg      |
| Vitamin B12                           | 609.756 mcg    | 25.000 mcg    |
| Niacinamide (3a315)                   | 731.707 mg     | 30.000 mg     |
| Pantothenic acid (3a841)              | 243.902 mg     | 10.000 mg     |
| Folic acid (3a316)                    | 24.390 mg      | 1.000 mg      |
| Vitamin C1 monophosphate (3a312)      | 3,810.732 mg   | 156.240 mg    |
| Choline chloride                      | 7,317.073 mg   | 300.000 mg    |
| Acids                                 | 7.180 %        | 0.294 %       |
| ProHacid                              | 9.756 %        | 0.400 %       |
| 6-Phytase (4a16) (Optiphos)           | 8,536.585 OTU  | 350.000 OTU   |
| 1,4-β-xyl. (4a1617) (Hostazym X)      | 36,585.370 EPU | 1,500.000 EPU |
| Cinergy Piglets                       | 9,756.098 mg   | 400.000 mg    |
| BHT (Butylated Hydroxytoluene) (E321) | 58.537 mg      | 2.400 mg      |
| Xantophylls                           | 0.015 mg       | 0.001 mg      |
| Flavour/sweetener                     | 9,756.098 mg   | 400.000 mg    |
| Sepiolite clay (E563)                 | 0.360 %        | 0.015 %       |
| L-lysine NCl                          | 12.805 %       | 0.525 %       |
| DL-methionine                         | 3.756 %        | 0.154 %       |
| L-threonine                           | 5.488%         | 0.225 %       |
| L-tryptophan                          | 0.415 %        | 0.017%        |
| Salt                                  | 12.537 %       | 0.514 %       |
| Iron Sulphate Monohydrate             | 9,756.098 mg   | 400.000 mg    |
| Copper Sulphate Pentahydrate          | 15,609.760 mg  | 640.000 mg    |
| Zinc oxide                            | 3,726.287 mg   | 152.778 mg    |
| Manganese Sulphate Monohydrate        | 5,335.366 mg   | 218.750 mg    |
| Calcium Iodate Anhydrous              | 38.109 mg      | 1.562 mg      |
| Sodium Selenite                       | 13.550 mg      | 0.556 mg      |
| Liquids                               | 0.195 %        | 0.008%        |
| Density                               | 1.333 T/M3     | 1.333 T/M3    |

**Supplementary Table 3.** Average rectal temperatures of piglets per treatment group.

| Treatment | Study Day (°C)    |      |      |      |      |      |
|-----------|-------------------|------|------|------|------|------|
|           | 0 (pre-challenge) | 1    | 2    | 3    | 4    | 5    |
| T1        | 37.8              | 38.3 | 38.1 | 37.6 | 38.7 | 38.0 |
| T2        | 39.1              | 38.6 | 38.1 | 38.9 | 38.4 | 38.3 |
| T3        | 38.9              | 40.3 | 38.7 | 38.4 | 39.5 | 38.7 |
| T4        | 39.2              | 40.3 | 39.2 | 38.7 | 38.9 | 38.9 |

**Supplementary Table 4.** Average weight of piglets per treatment group.

| Treatment | Study Day (kg) |                   |      |      |      |      |      |
|-----------|----------------|-------------------|------|------|------|------|------|
|           | -8             | 0 (pre-challenge) | 1    | 2    | 3    | 4    | 5    |
| T1        | 7.28           | 8.10              | 8.38 | 8.65 | 8.91 | 9.02 | 9.10 |
| T2        | 7.33           | 7.92              | 8.13 | 8.48 | 8.73 | 9.17 | 9.40 |
| T3        | 7.36           | 7.92              | 7.83 | 7.56 | 7.76 | 7.89 | 8.09 |
| T4        | 7.49           | 7.94              | 7.92 | 7.49 | 7.41 | 7.23 | 7.59 |

**Supplementary Table 5.** Average faecal scoring of piglets per treatment group.

| Treatment | Study Day (faecal score*) |     |     |     |     |     |
|-----------|---------------------------|-----|-----|-----|-----|-----|
|           | 0 (pre-challenge)         | 1   | 2   | 3   | 4   | 5   |
| T1        | 1.5                       | 1.0 | 1.0 | 1.0 | 3.0 | 2.5 |
| T2        | 1.6                       | 1.6 | 1.3 | 1.0 | 1.2 | 1.4 |
| T3        | 1.0                       | 1.3 | 2.0 | 2.2 | 2.3 | 2.7 |
| T4        | 1.5                       | 2.2 | 3.5 | 3.6 | 3.2 | 2.9 |

\*Faecal score were categorised as: 1 - Normal, firm but not hard; 2 - Soft, does not hold form; 3 - Runny, spread like pancake mix; 4 - Watery, liquid like orange juice.

**Supplementary Table 6.** Feed consumed by piglets per treatment group.

| Treatment | Creep Feed/Untreated Feed Transitional Period |                  |                  |                  |                  | Phage Feed Provision (T2 and T4) and Untreated Feed Provision (T1 and T3) |                  |                  |                 |                 |                 |                 |                 |                             |                            |                                   |
|-----------|-----------------------------------------------|------------------|------------------|------------------|------------------|---------------------------------------------------------------------------|------------------|------------------|-----------------|-----------------|-----------------|-----------------|-----------------|-----------------------------|----------------------------|-----------------------------------|
|           | Feed eaten SD -8                              | Feed eaten SD -7 | Feed eaten SD -6 | Feed eaten SD -5 | Feed eaten SD -4 | Feed eaten SD -3                                                          | Feed eaten SD -2 | Feed eaten SD -1 | Feed eaten SD 0 | Feed eaten SD 1 | Feed eaten SD 2 | Feed eaten SD 3 | Feed eaten SD 4 | Feed Intake SD -8 to Day -4 | Feed Intake SD -3 to Day 5 | Total Feed Intake Day -8 to Day 5 |
|           | (kg)                                          | (kg)             | (kg)             | (kg)             | (kg)             | (kg)                                                                      | (kg)             | (kg)             | (kg)            | (kg)            | (kg)            | (kg)            | (kg)            | (kg)                        | (kg)                       | (kg)                              |
| T1        | 0.00                                          | *                | 0.42             | 0.34             | 0.38             | 0.34                                                                      | 0.34             | 0.44             | 0.46            | 0.44            | 0.66            | 0.52            | 0.40            | 1.14                        | 3.60                       | 4.74                              |
| T2        | 0.00                                          | *                | 0.82             | 0.90             | 1.00             | 0.68                                                                      | 0.78             | 1.10             | 1.44            | 1.64            | 1.94            | 2.16            | 2.12            | 2.72                        | 11.86                      | 14.58                             |
| T3        | 0.00                                          | *                | 0.76             | 0.62             | 0.62             | 0.90                                                                      | 0.94             | 1.00             | 0.46            | 0.36            | 0.84            | 0.86            | 1.04            | 2.00                        | 6.40                       | 8.40                              |
| T4        | 0.00                                          | *                | 0.48             | 0.70             | 0.68             | 0.78                                                                      | 0.78             | 1.06             | 0.44            | 0.22            | 0.42            | 0.42            | 0.60            | 1.86                        | 4.72                       | 6.58                              |

\* Feed contaminated with shavings, amount weighed out greater than amount offered. Amount of feed eaten unknown
